# Supplementary material for: A layered zinc phosphate decorated with organic fluorophores for selective luminescent sensing of metal cations
Source: Royal Society of Chemistry journal article supplement (doi:10.1039/c2dt31276j), 2012-01-01
Supplement: c2dt31276j.pdf [file c2dt31276j.pdf]

## Supporting information

### **A layered zinc phosphate decorated with organic fluorophore for selective luminescent sensing of metal cations**

Zhiyong Fu, Desheng Song, Yu Zeng, Shijun Liao, Jingcao Dai

#### **Experimental Section**

All the reagents were purchased from commercial channels and used without further purification; TPT was synthesized as reported. A TA Instrument Q600 SDT thermogravimetric analyzer was used to obtain the TGA curve in N<sub>2</sub> at a rate of 10 °C min<sup>-1</sup>. The emission/excitation spectra were recorded on a HITACHI F-4500 fluorescence spectrophotometer. IR spectra were characterized by a Bruker Tensor 27 FTIR spectrometer in the range of 4000-400 cm<sup>-1</sup> using a KBr disk. The X-ray powder diffraction (XRD) data were collected with a Bruker D8 Advance X-ray diffractometer using CuK $\alpha$  radiation ( $\lambda = 1.5406 \text{ \AA}$ ). The ion-exchange fractions are determined quantitatively by atomic absorption spectroscopy (AAS) on a HITACHI Z-2300 instrument.

A solution of Zn(NO<sub>3</sub>)<sub>2</sub>·6H<sub>2</sub>O (0.58g, 2mmol), TPT (0.1g, 0.32mmol), H<sub>3</sub>PO<sub>3</sub> (0.164g, 2mmol) and H<sub>2</sub>O (4 mL) was stirred for 30min. The mixture was sealed in a 23ml Teflon-lined steel bomb and heated at 170°C for 4320min. Red block-like crystals were collected in 32% yield based on Zn(NO<sub>3</sub>)<sub>2</sub>·6H<sub>2</sub>O.

Solid state luminescent properties were investigated at room temperature on a HITACHI F-4500 fluorescence spectrophotometer with the conditions of the method (PMT voltage: 400 V, scan speed: 240 nm/min, slit widths: ex 5.0 nm and em 5.0 nm). The ion exchanged sample of **1** was prepared by introducing 100 mg of dehydrated compound **1** (pretreated at 130 °C under vacuum) into 10.00 ml solution containing different amounts of  $M(\text{NO}_3)_x$  ( $M = \text{Cr}^{3+}, \text{Ni}^{2+}, \text{Ca}^{2+}, \text{Na}^+, \text{Mg}^{2+}$  respectively), and collected by filtration and dried for 24 h.

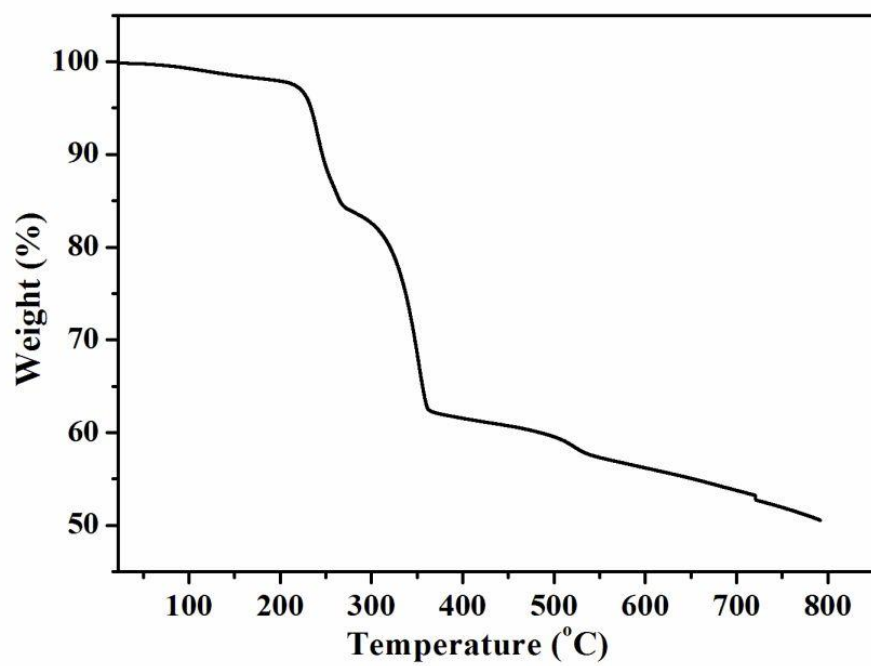

**Figure S1.** Thermal gravimetric curve of **1**

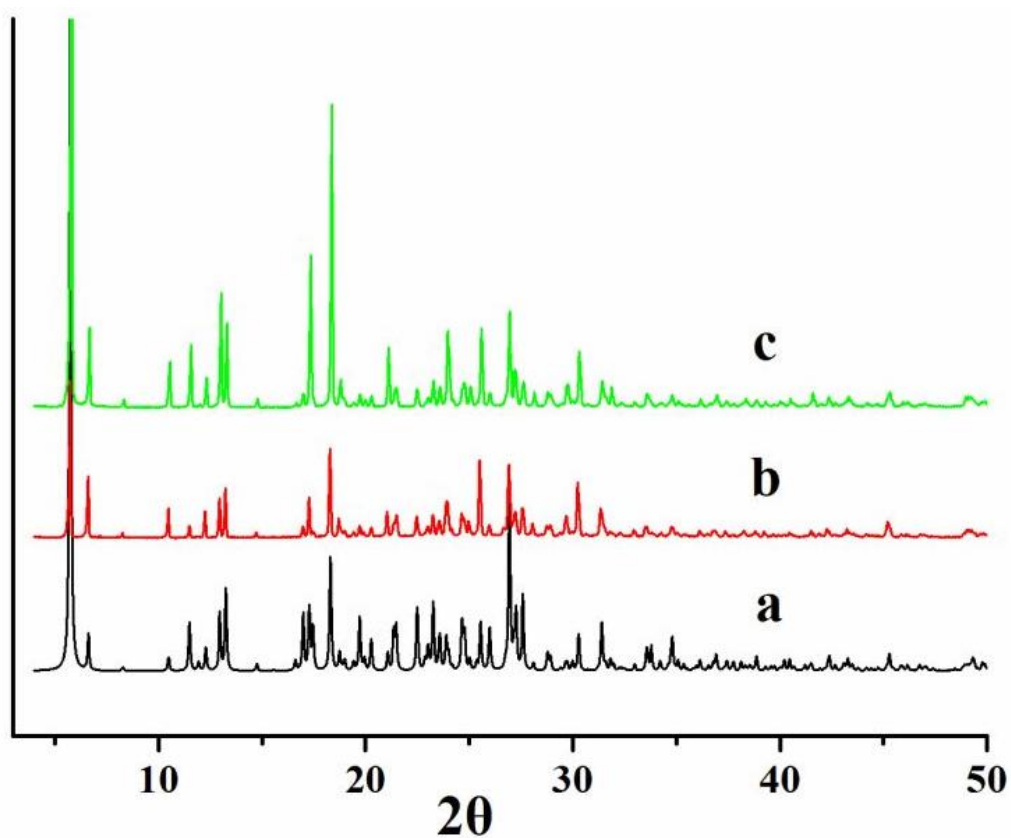

**Figure S2** PXRd patterns for compound **1**: (a) simulated; (b) of a sample at room temperature; (c) of a sample calcined at 130°C for 2 h in vacuum.

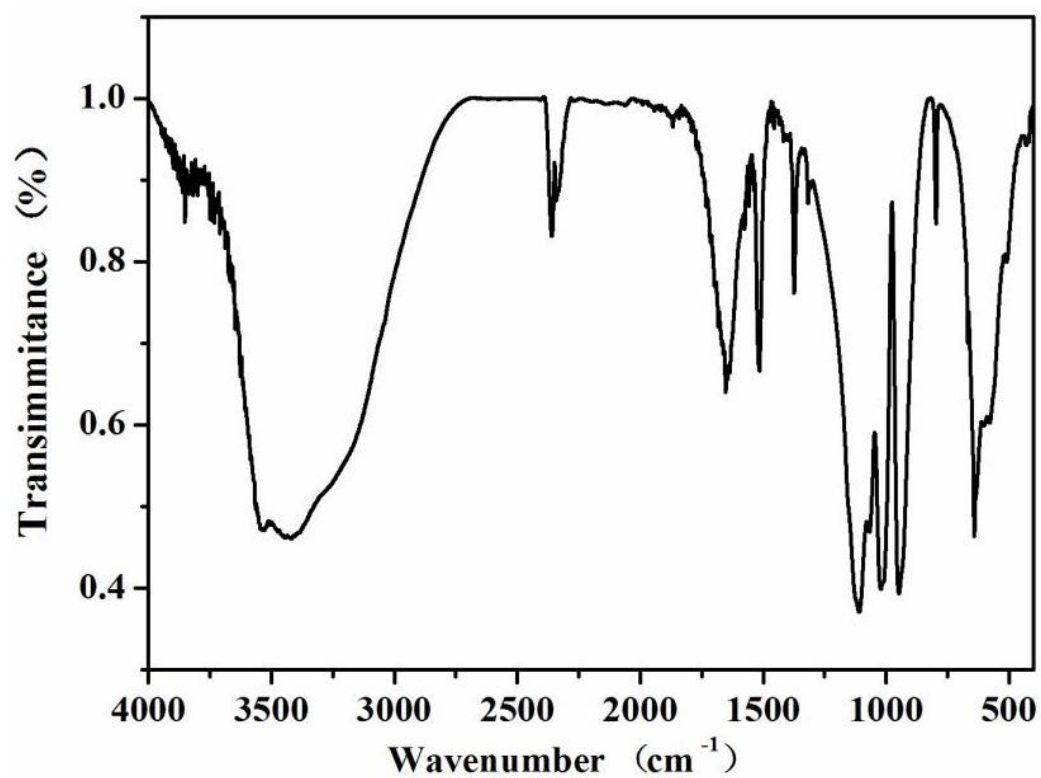

**Figure S3.** IR spectra of compound 1
